# Supplementary material for: Madagascar ground gecko genome analysis characterizes asymmetric fates of duplicated genes
Source: PubMed Central journal article supplement (PMC5901865; doi:10.1186/s12915-018-0509-4), 2018-04-16
Supplement: 12915_2018_509_MOESM2_ESM.pdf [file 12915_2018_509_MOESM2_ESM.pdf]

## Additional file 2

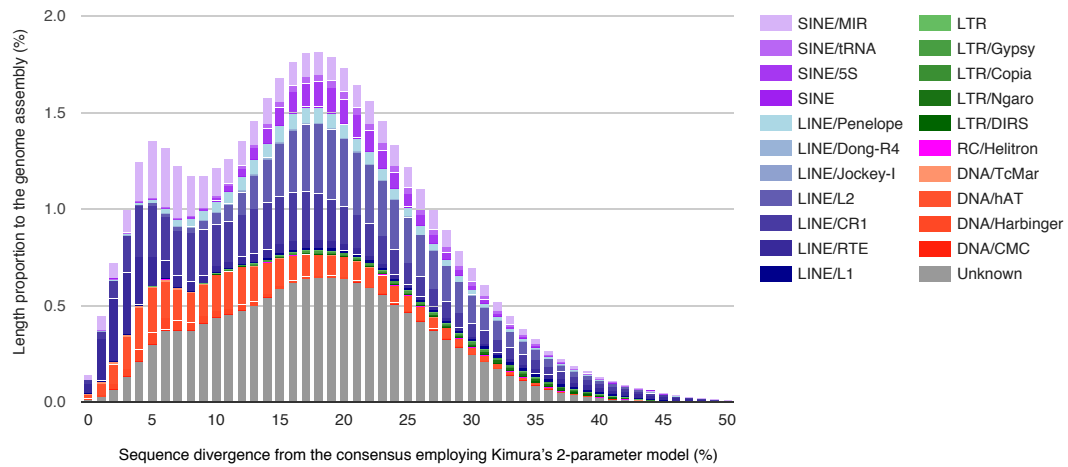

### Figure S1. Repeat landscape

Relative abundances of repeat classes in the *P. picta* genome assembly are shown along sequence divergences against consensus, which can be correlated to the age from the generation of the repeats, based on the Kimura's two-parameter method. The figure was produced with the script `createRepeatLandscape.pl` supplied with RepeatMasker. Detailed statistics of the repeat contents are included in Additional file 1: Table S4.
