# Supplementary material for: Madagascar ground gecko genome analysis characterizes asymmetric fates of duplicated genes
Source: PubMed Central journal article supplement (PMC5901865; doi:10.1186/s12915-018-0509-4), 2018-04-16
Supplement: 12915_2018_509_MOESM5_ESM.pdf [file 12915_2018_509_MOESM5_ESM.pdf]

**Additional file 5**

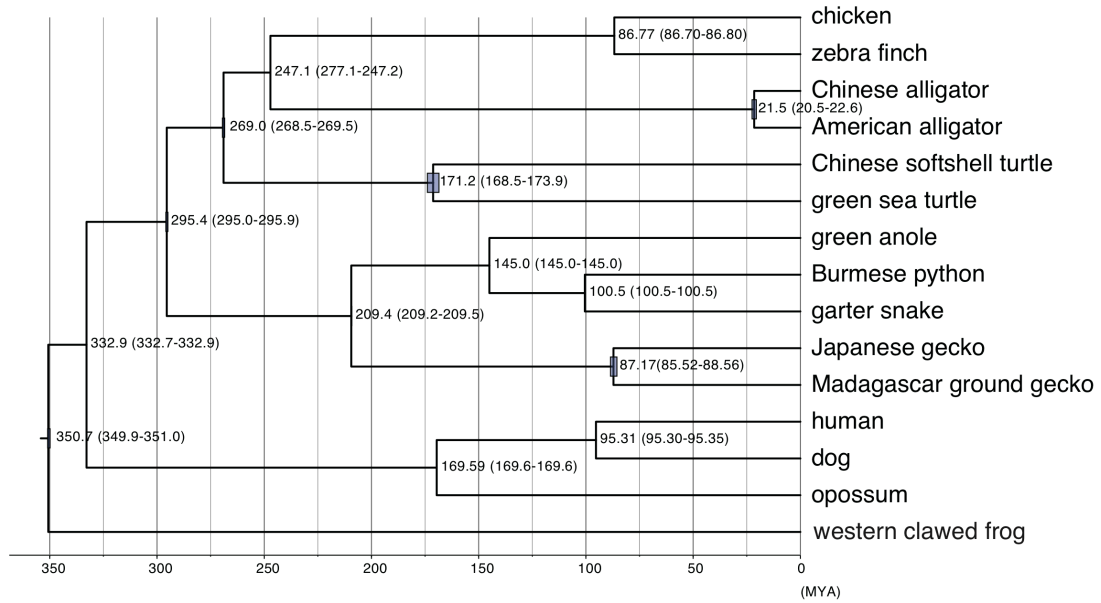

**Figure S3. Divergence times between major reptile lineages**

Inferred divergence times using 1,545 one-to-one orthologs. The median of the divergence time is scaled at a branching point, and a 95% credible interval (values are shown in parentheses) is represented as a width of a blue box. Fossil calibrations used for the divergence time inference are included in Additional file 1: Table S17.
