# Supplementary material for: Madagascar ground gecko genome analysis characterizes asymmetric fates of duplicated genes
Source: PubMed Central journal article supplement (PMC5901865; doi:10.1186/s12915-018-0509-4), 2018-04-16
Supplement: 12915_2018_509_MOESM6_ESM.pdf [file 12915_2018_509_MOESM6_ESM.pdf]

**Additional file 6**

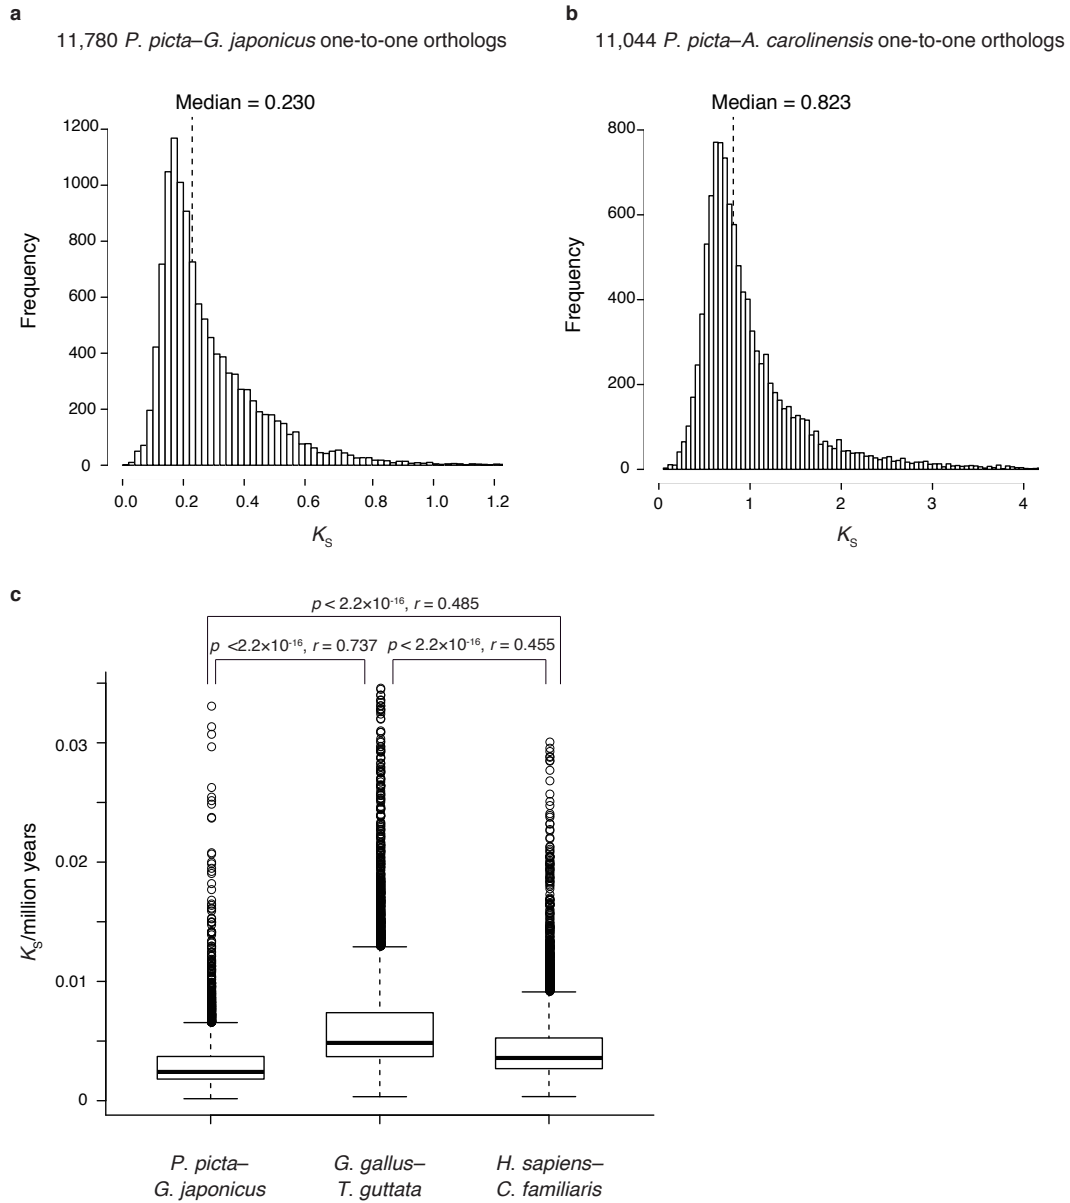

**Figure S4.  $K_S$  distribution of the *P. picta* genes**

(a) Frequency distribution of  $K_S$  for one-to-one ortholog pairs of Madagascar ground gecko and Japanese gecko. The histogram contained 11,780 ortholog pairs out of 12,889 (Additional file 1: Table S9) with  $\geq 300$  aligned nucleotide sites and  $K_S < 3$ . (b) Frequency distribution of  $K_S$  for one-to-one ortholog pairs of Madagascar ground gecko and green anole. The histogram contained 11,044 pairs out of 12,330 (Additional file 1: Table S9) with  $\geq 300$  aligned nucleotide sites and  $K_S < 5$ . (c) Distributions of  $K_S$  per million years between Madagascar ground gecko and Japanese gecko (median,

0.00243), between chicken and zebra finch (median, 0.00487), and between human and dog (median, 0.00361). For each pair, the  $p$ -value based on the Mann–Whitney  $U$  test and the effect size, denoted as Pearson  $r$ , were shown. The distribution is composed by 6,231 one-to-one ortholog sextets that were retained by these species with  $\geq 300$  aligned nucleotide sites with  $K_s < 3$  for any of the gecko, avian, and mammalian pairs. The median of divergence times included in Table 2 were used for the normalization.
