# Supplementary material for: Madagascar ground gecko genome analysis characterizes asymmetric fates of duplicated genes
Source: PubMed Central journal article supplement (PMC5901865; doi:10.1186/s12915-018-0509-4), 2018-04-16
Supplement: 12915_2018_509_MOESM8_ESM.pdf [file 12915_2018_509_MOESM8_ESM.pdf]

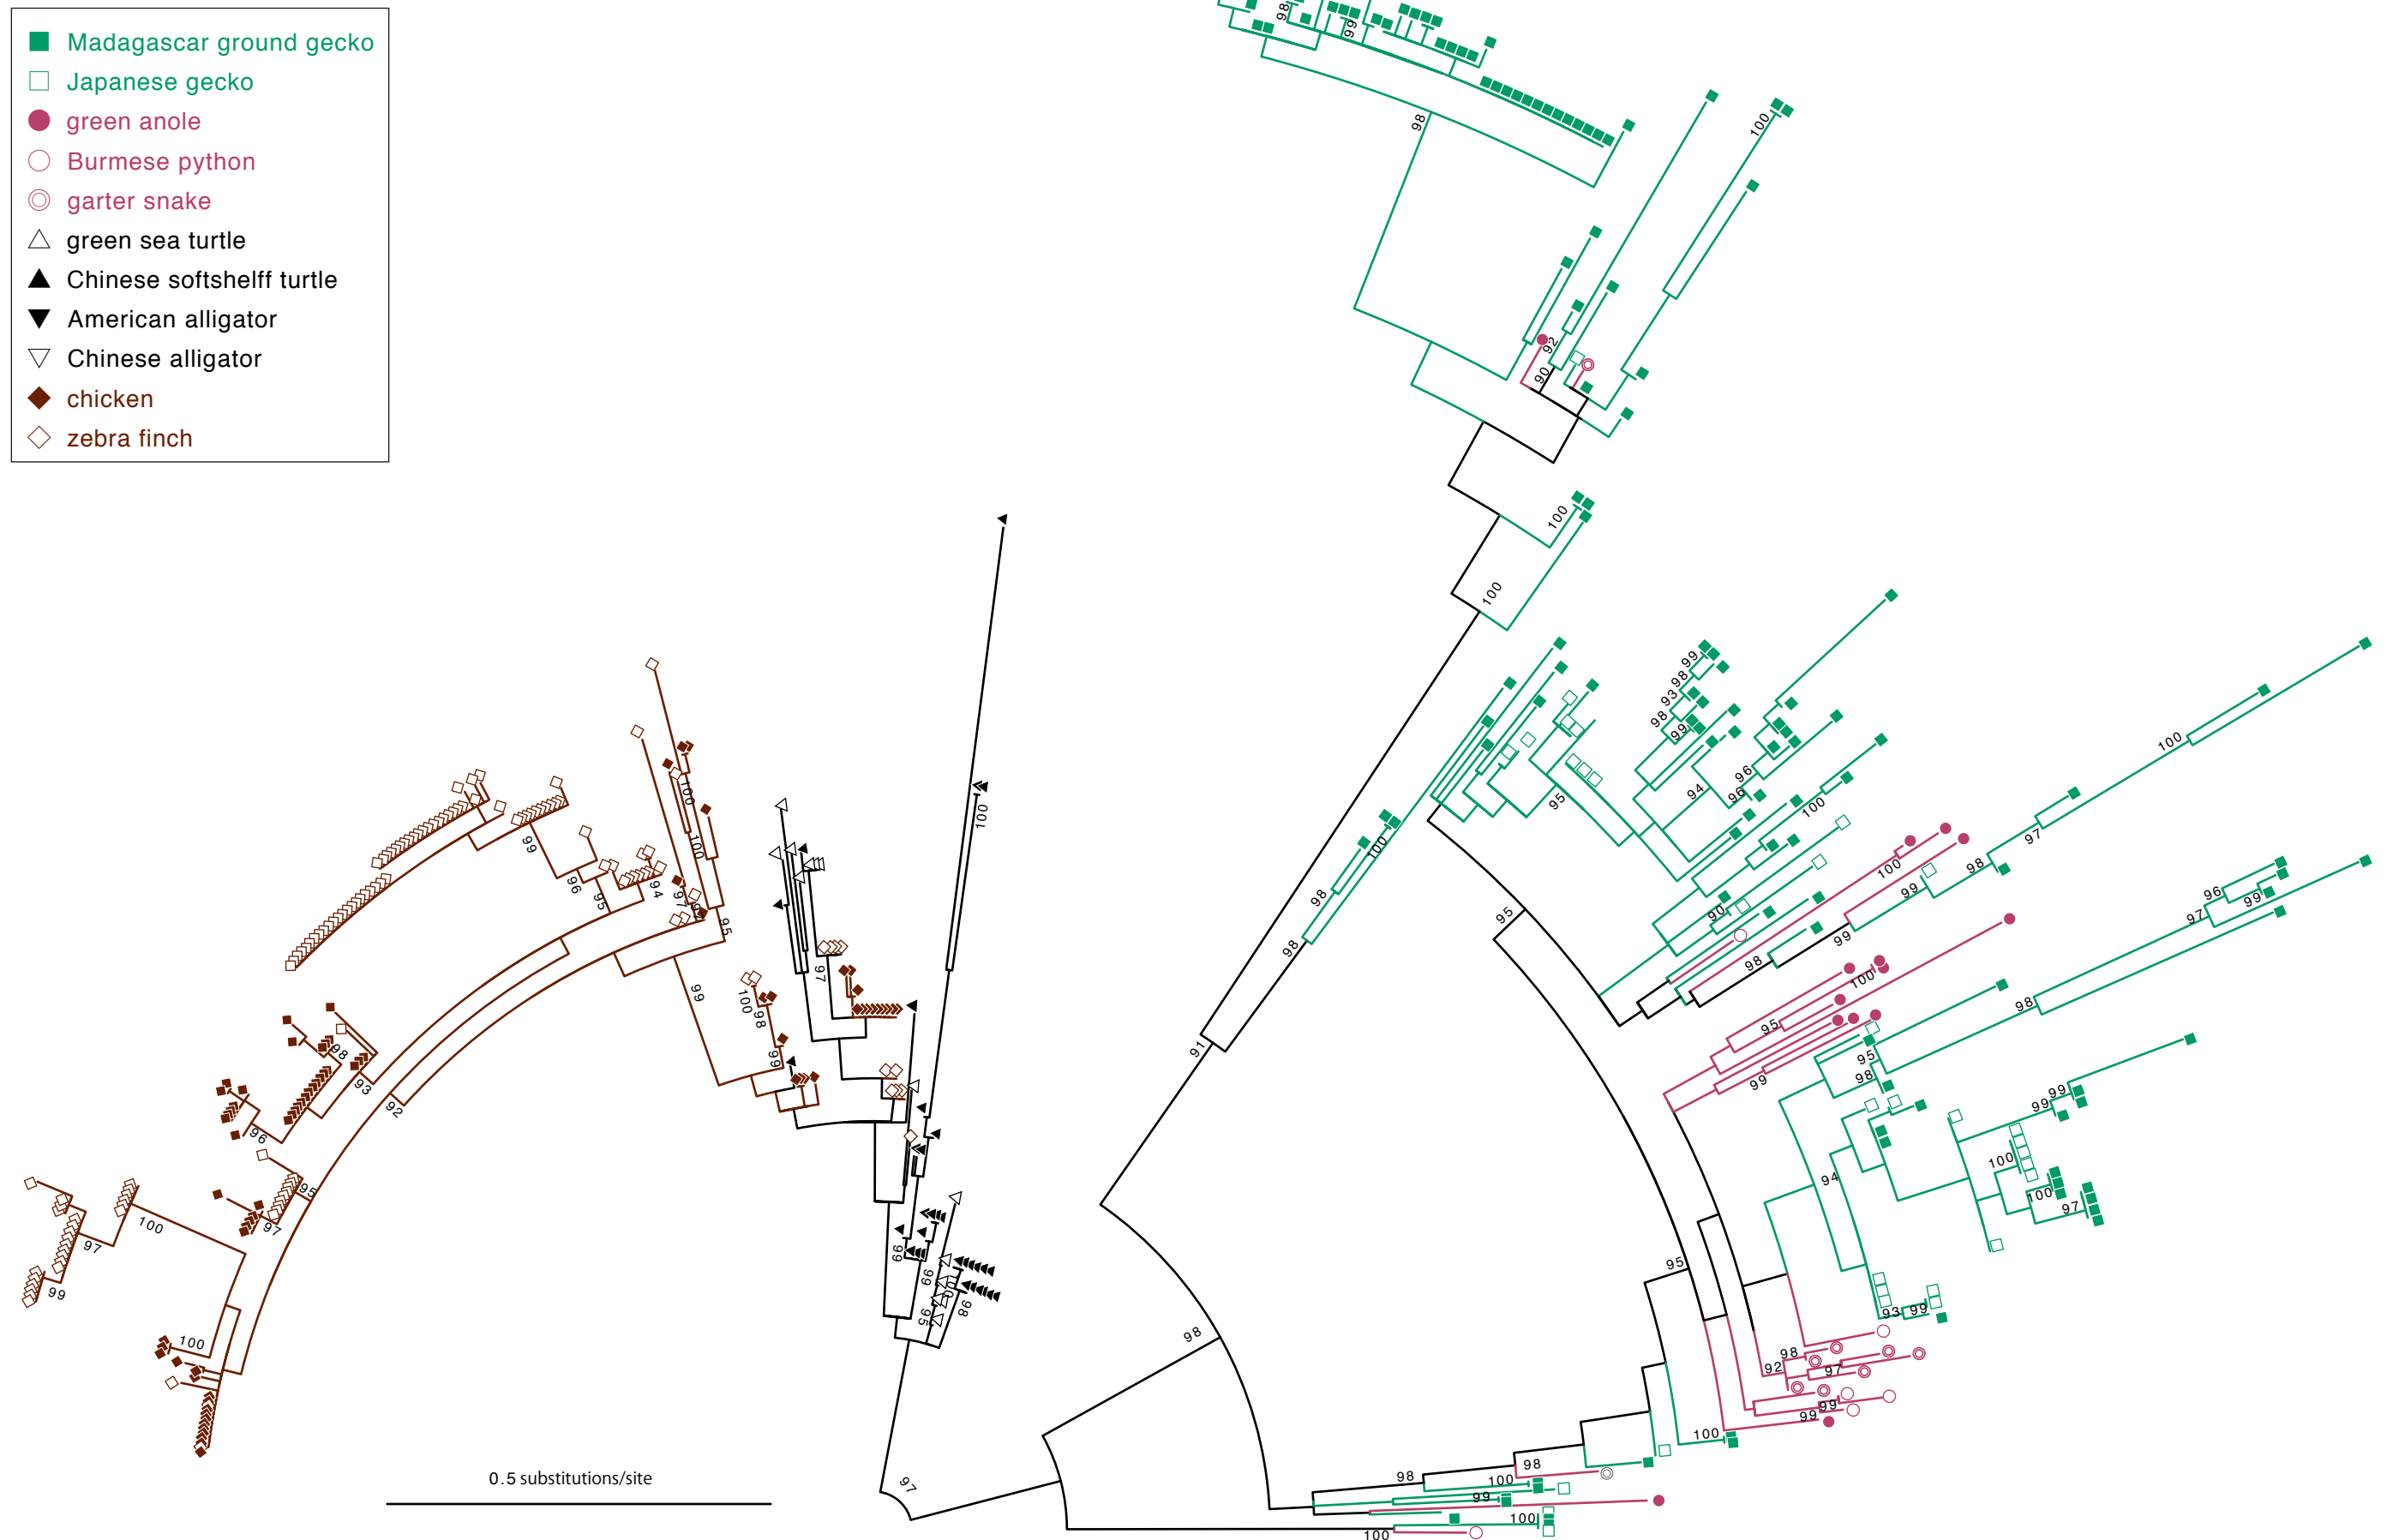

**Figure S6. Beta-keratin gene tree**

Phylogenetic tree of beta-keratin genes composed by 40 aligned sites of the amino acid sequences of the ortholog group AmnPhylome\_0000003. The tree was inferred with IQ-TREE assuming the LG4X model. Gene names were replaced with the symbols corresponding to the species for visibility. Values at the nodes are ultrafast bootstrap approximation values with high reliability ( $\geq 90$ ). Branches of the geckos, and anole/snakes, and avian lineages are in green, red, and brown, respectively. Some of the truncated sequences of the Madagascar ground gecko beta-keratin genes were removed from the multiple alignment for the tree inference. The Japanese gecko homologs were retrieved from the RefSeq database, though the 71 beta-keratin genes of this gecko identified by its genome sequencing project were unavailable.
