# Supplementary material for: Madagascar ground gecko genome analysis characterizes asymmetric fates of duplicated genes
Source: PubMed Central journal article supplement (PMC5901865; doi:10.1186/s12915-018-0509-4), 2018-04-16
Supplement: 12915_2018_509_MOESM10_ESM.pdf [file 12915_2018_509_MOESM10_ESM.pdf]

## Additional file 10

**a** Positional proximity between elusive genes

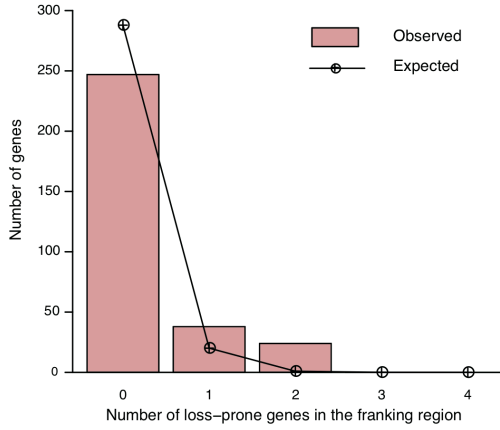

**b** Gene retention frequency among species

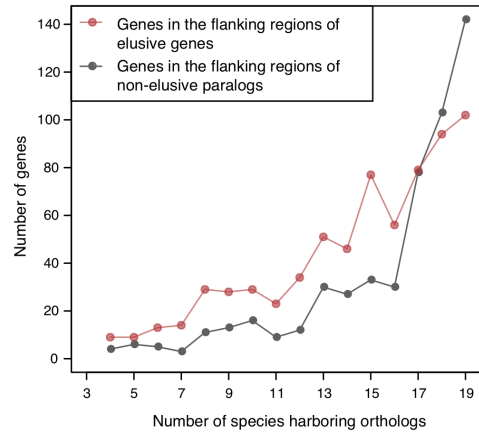

**c** Synonymous substitution rates ( $K_s$ ) between *P. picta* and *G. japonicus* orthologs

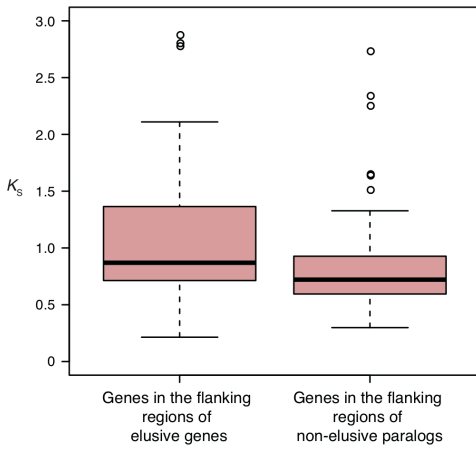

**d** Gene density

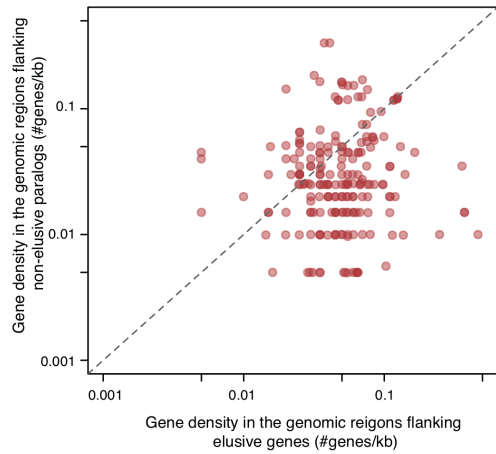

**e** Repeat density

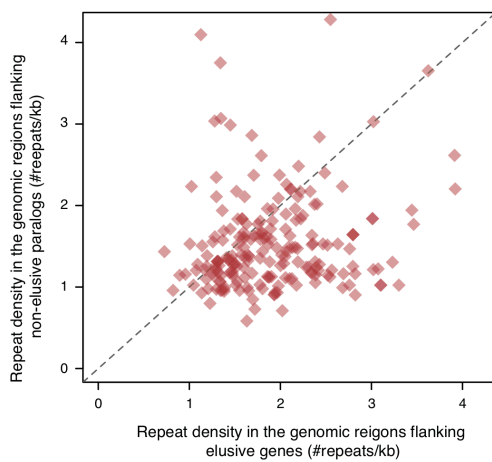

**f** GC-content

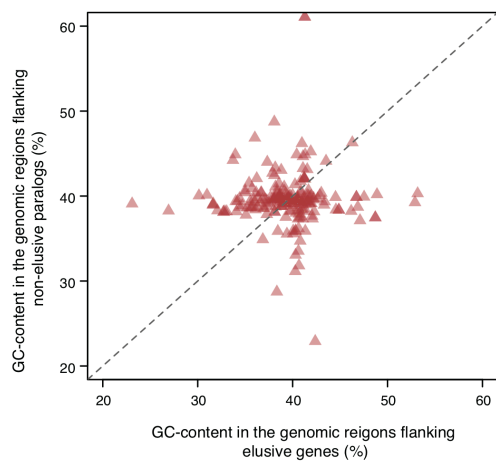

**Figure S7. Genomic characters of the elusive and their non-elusive paralogs in the anole genome**

(a) Fractions of the 298 elusive genes in the anole genome flanking other elusive genes. The observed and expected values are significantly different ( $p = 1.53 \times 10^{-27}$ , the exact test of goodness of fit). (b) Frequency distributions of the genes flanked by the 176 elusive genes and their non-elusive paralogs in accordance with the numbers of species retaining their orthologs. The two distributions exhibit a significant difference ( $p = 3.37 \times 10^{-16}$ , Mann–Whitney  $U$  test). (c) Comparison of synonymous substitution rates ( $K_s$ ) comparison between the genes flanking the elusive and non-elusive genes. These  $K_s$  were significantly different ( $p = 1.55 \times 10^{-5}$ , Mann–Whitney  $U$  test). Each  $K_s$  was computed with an ortholog pair of Madagascar ground gecko and green anole. (d) Gene densities in the flanking regions of the elusive genes and their non-elusive paralogs, which are significantly different between these two regions ( $p = 1.37 \times 10^{-8}$ , Wilcoxon signed-rank test). (e) Repeat densities of the genomic regions containing the elusive genes or their non-elusive paralogs with their flanking regions, which are significantly different between the two regions ( $p = 7.94 \times 10^{-15}$ , Wilcoxon signed-rank test). (f) GC-contents consisting of the elusive genes or their non-elusive paralogs and their flanking regions, which are significantly different between the two regions ( $p = 0.539$ , Wilcoxon signed-rank test). See methodological details in Fig. 5.
