# Supplementary material for: Madagascar ground gecko genome analysis characterizes asymmetric fates of duplicated genes
Source: PubMed Central journal article supplement (PMC5901865; doi:10.1186/s12915-018-0509-4), 2018-04-16
Supplement: 12915_2018_509_MOESM11_ESM.pdf [file 12915_2018_509_MOESM11_ESM.pdf]

## Additional file 11

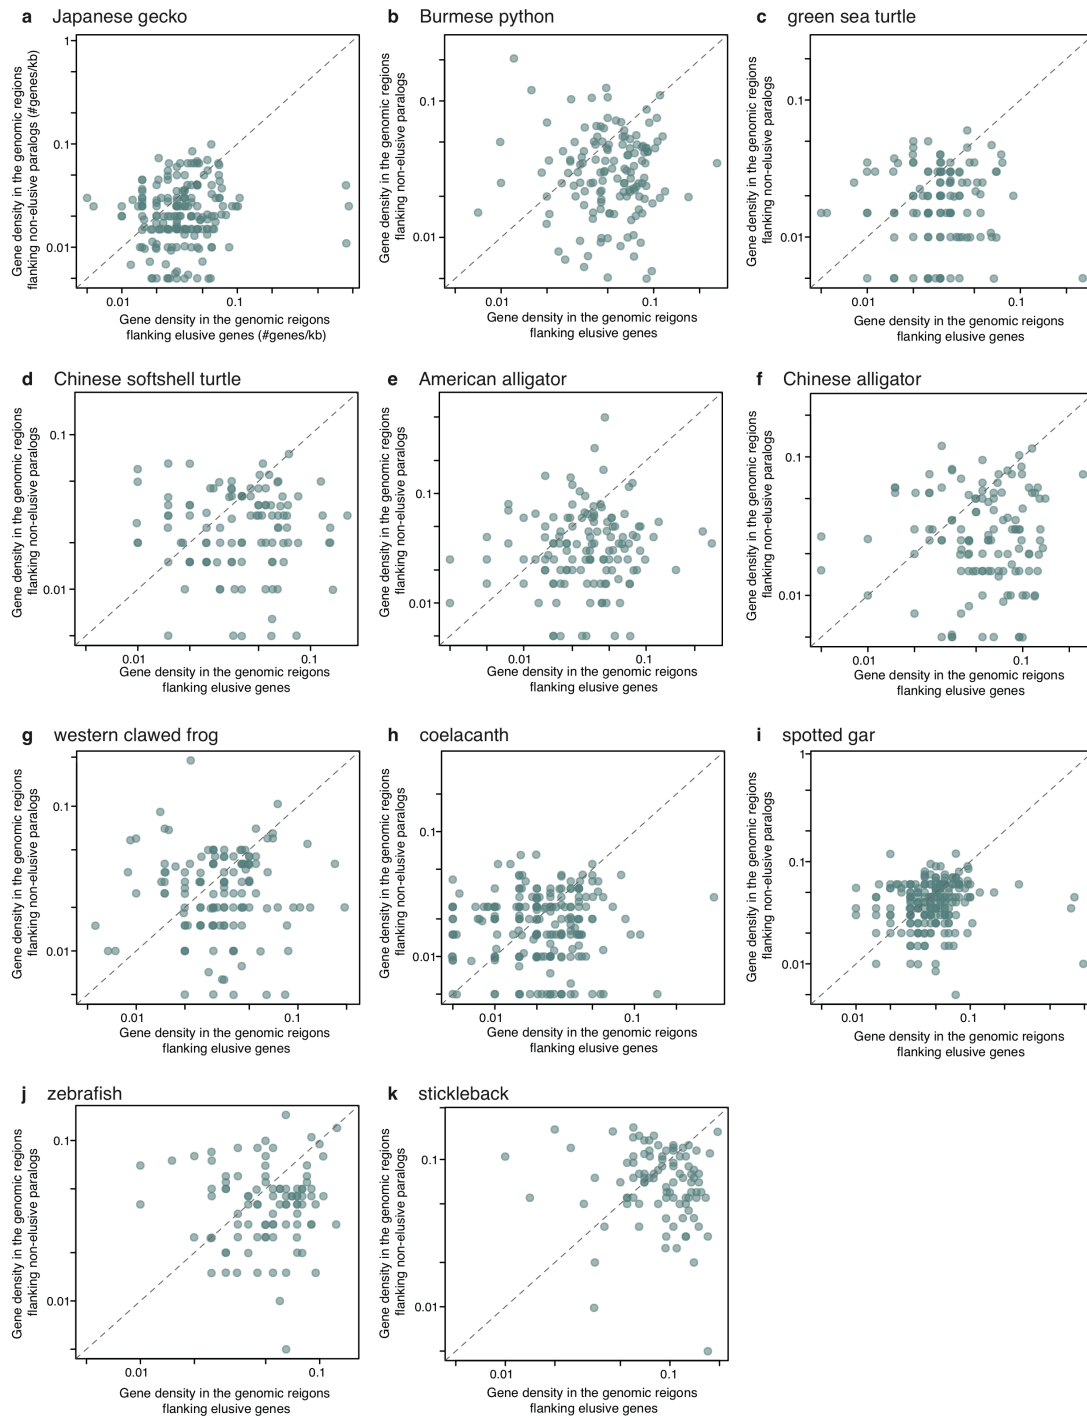

**Figure S8. Gene densities in the 100 kb-flanking regions of the orthologs of the elusive reptile genes and their non-elusive genes**

Gene densities of the flanking regions of the elusive genes and their non-elusive paralogs are shown for reptiles and outgroups. *P*-values and effect size below were computed based on the Wilcoxon signed-rank test and signed Pearson *r* between the two classes for each species, respectively: **(a)**  $p = 3.16 \times 10^{-11}$ ,  $r = 0.453$ ; **(b)**  $p = 8.87 \times 10^{-11}$ ,  $r = 0.537$ ; **(c)**  $p = 2.27 \times 10^{-9}$ ,  $r = 0.461$ ; **(d)**  $p = 4.43 \times 10^{-9}$ ,  $r = 0.465$ ; **(e)**  $p = 9.98 \times 10^{-11}$ ,  $r = 0.510$ ; **(f)**  $p = 1.67 \times 10^{-12}$ ,  $r = 0.563$ ; **(g)**  $p = 1.94 \times 10^{-6}$ ,  $r = 0.417$ ; **(h)**  $p = 6.46 \times 10^{-6}$ ,  $r = 0.284$ ; **(i)**  $p = 0.000155$ ,  $r = 0.226$ ; **(j)**  $p = 0.000173$ ,  $r = 0.196$ ; **(k)**  $p = 0.0125$ ,  $r = 0.213$ .
