# Supplementary material for: Madagascar ground gecko genome analysis characterizes asymmetric fates of duplicated genes
Source: PubMed Central journal article supplement (PMC5901865; doi:10.1186/s12915-018-0509-4), 2018-04-16
Supplement: 12915_2018_509_MOESM12_ESM.pdf [file 12915_2018_509_MOESM12_ESM.pdf]

## Additional file 12

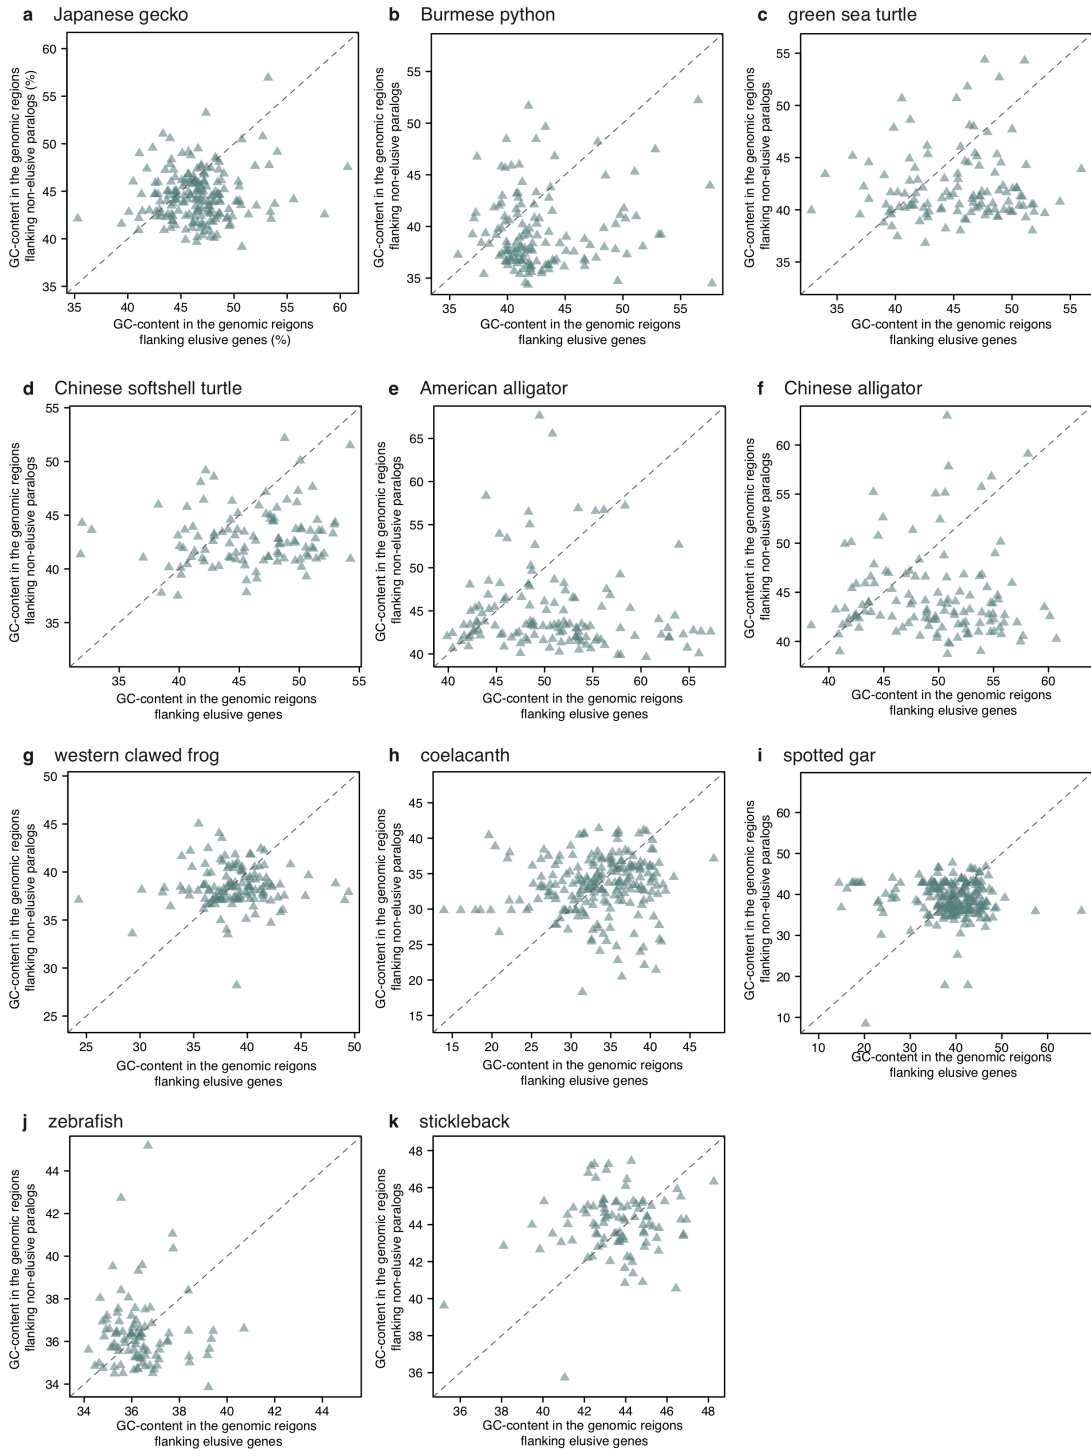

**Figure S9. GC-content in the genomic regions including the orthologs of the elusive reptile genes and their non-elusive genes**

GC-content of the genomic regions consisting of the elusive genes and their non-elusive paralogs with their flanking regions are shown for reptiles and outgroups. *P*-values and effect size below were computed based on the Wilcoxon signed-rank test and signed Pearson *r* between the two classes for each species, respectively: **(a)**  $p = 4.85 \times 10^{-11}$ ,  $r = 0.475$ ; **(b)**  $p = 1.80 \times 10^{-13}$ ,  $r = 0.591$ ; **(c)**  $p = 2.51 \times 10^{-9}$ ,  $r = 0.515$ ; **(d)**  $p = 1.02 \times 10^{-10}$ ,  $r = 0.552$ ; **(e)**  $p = 1.65 \times 10^{-11}$ ,  $r = 0.551$ ; **(f)**  $p = 8.64 \times 10^{-13}$ ,  $r = 0.509$ ; **(g)**  $p = 0.776$ ,  $r = -0.0250$ ; **(h)**  $p = 0.188$ ,  $r = 0.0922$ ; **(i)**  $p = 0.0118$ ,  $r = 0.170$ ; **(j)**  $p = 0.0163$ ,  $r = -0.143$ ; **(k)**  $p = 0.0680$ ,  $r = 0.159$ .
