# Supplementary material for: Madagascar ground gecko genome analysis characterizes asymmetric fates of duplicated genes
Source: PubMed Central journal article supplement (PMC5901865; doi:10.1186/s12915-018-0509-4), 2018-04-16
Supplement: 12915_2018_509_MOESM14_ESM.pdf [file 12915_2018_509_MOESM14_ESM.pdf]

## Additional file 14

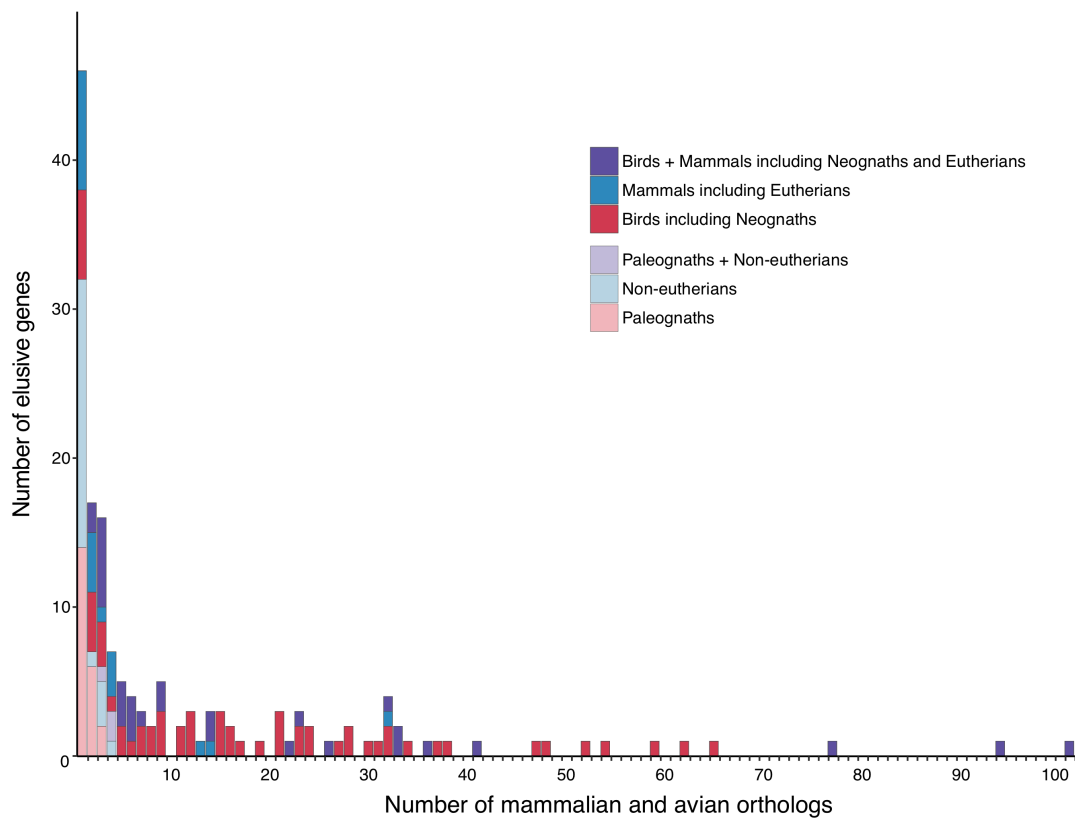

**Figure S11. Frequency distribution of the elusive genes relating to number of the mammalian and avian orthologs**

The graph consisted of 157 elusive genes whose putative orthologs of mammals and birds were identified. The elusive genes were classified into six groups in accordance with which taxonomy groups retained the orthologs.
