# Supplementary material for: Madagascar ground gecko genome analysis characterizes asymmetric fates of duplicated genes
Source: PubMed Central journal article supplement (PMC5901865; doi:10.1186/s12915-018-0509-4), 2018-04-16
Supplement: 12915_2018_509_MOESM15_ESM.pdf [file 12915_2018_509_MOESM15_ESM.pdf]

# Additional file 15

**a**

log-ratio of (FPKM+1 for elusive gene)  
(FPKM+1 for non-elusive paralog)

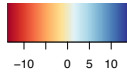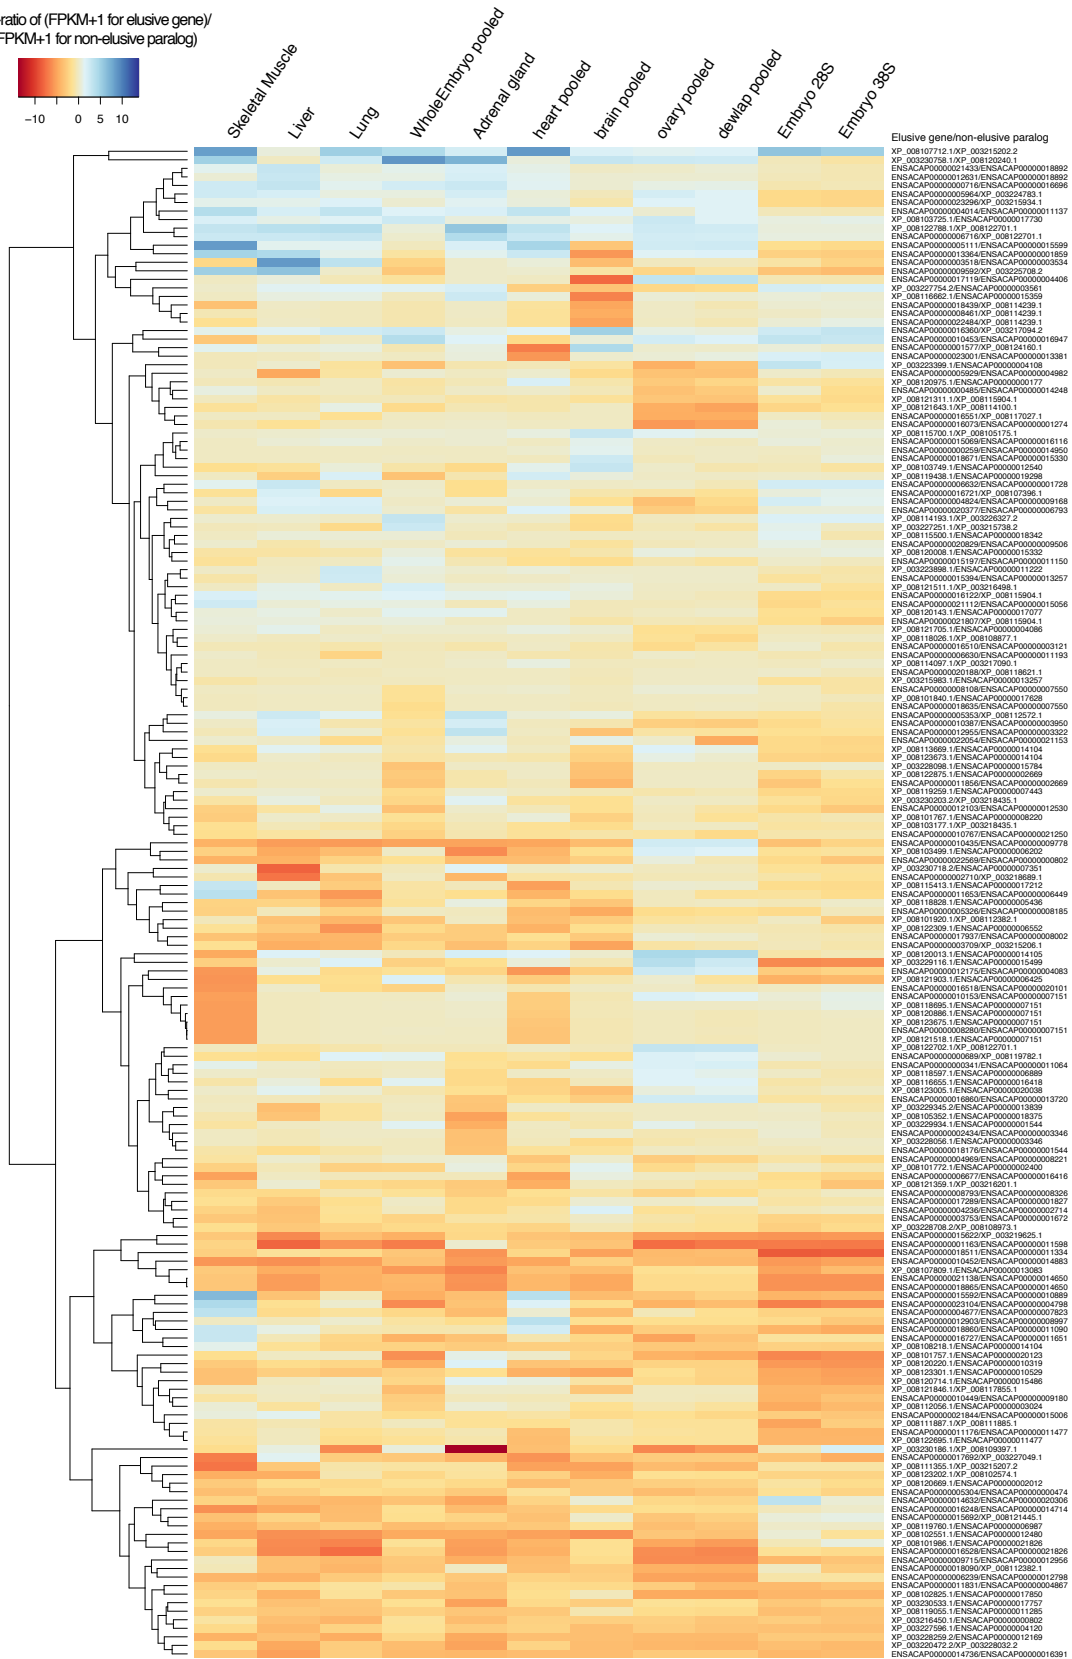

**b**

log-ratio of (FPKM+1 for elusive gene)/  
(FPKM+1 for non-elusive paralog)

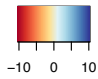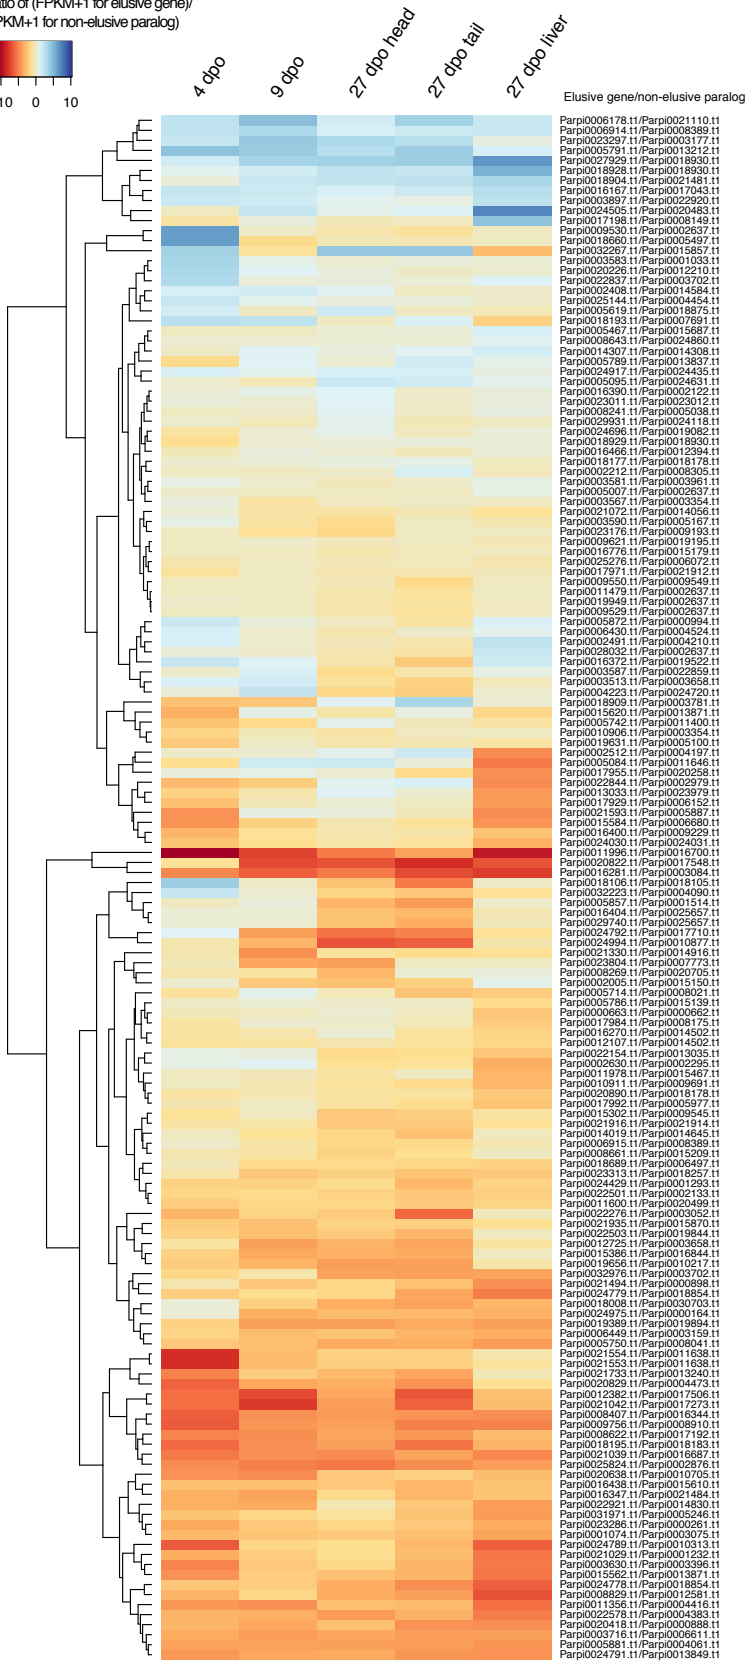

**Figure S12. Comparison of expression levels between the elusive genes and non-elusive genes**

Heatmaps representing log-fold ratios of expression levels (FPKM+1) between the elusive and non-elusive genes using eleven samples containing adult tissues and embryonic stages of green anole (**a**) and those using three embryonic stages of the Madagascar ground gecko (**b**). The heatmaps were generated with the heatmap.2 library implemented in R.
