# Supplementary material for: Madagascar ground gecko genome analysis characterizes asymmetric fates of duplicated genes
Source: PubMed Central journal article supplement (PMC5901865; doi:10.1186/s12915-018-0509-4), 2018-04-16
Supplement: 12915_2018_509_MOESM16_ESM.pdf [file 12915_2018_509_MOESM16_ESM.pdf]

Additional file 16

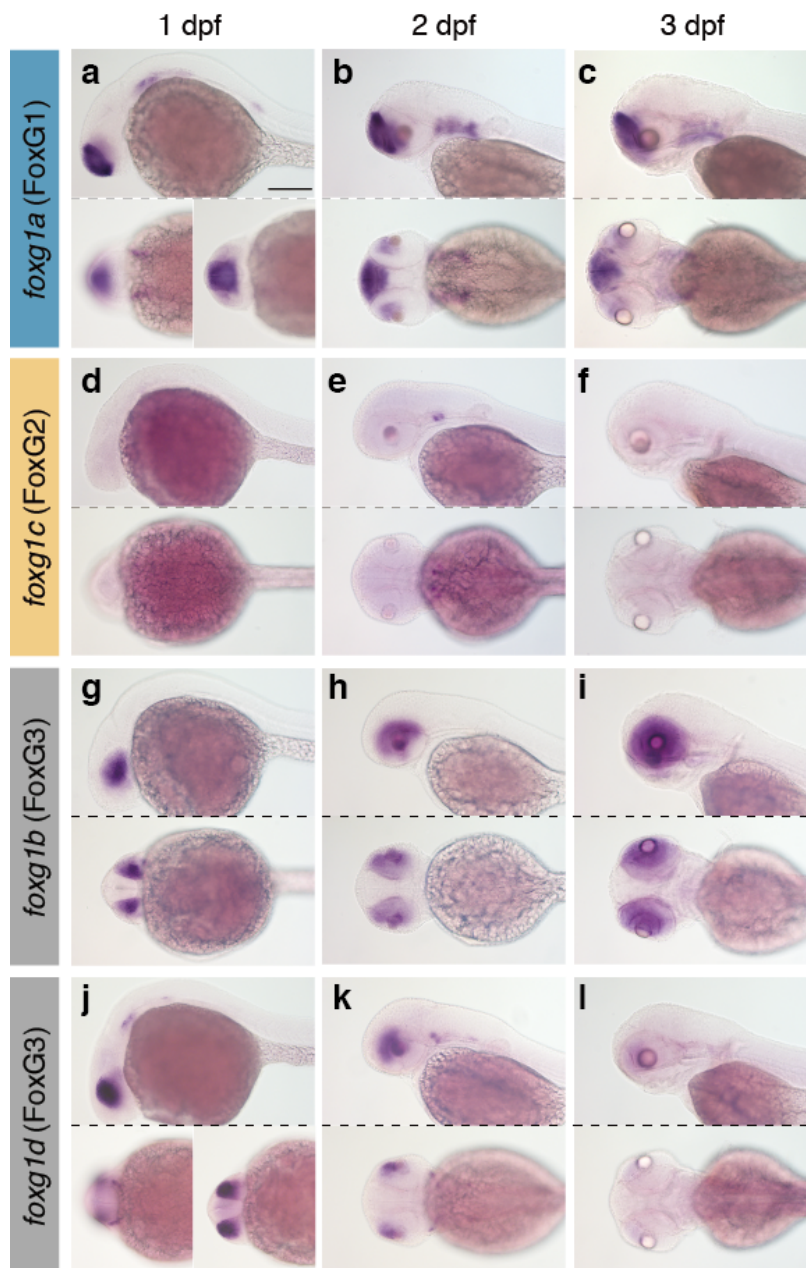

**Figure S13. Expression profiles of FoxG genes for zebrafish embryos**

Whole-mount in situ hybridization of *foxg1a* (**a-c**, the FoxG1 ortholog), *foxg1c* (**d-f**, the FoxG2 ortholog), and *foxg1b* (**g-i**) and *foxg1d* (**j-l**) (the FoxG3 orthologs) using 1-3 dpf zebrafish embryos. Individual embryos are displayed with lateral (upper) and dorsal (lower) views except for **g** and **h** with a ventral view and **a** and **j** with dorsal and ventral views in the lower panel.
