# Supplementary material for: Madagascar ground gecko genome analysis characterizes asymmetric fates of duplicated genes
Source: PubMed Central journal article supplement (PMC5901865; doi:10.1186/s12915-018-0509-4), 2018-04-16
Supplement: 12915_2018_509_MOESM17_ESM.pdf [file 12915_2018_509_MOESM17_ESM.pdf]

### Additional file 17

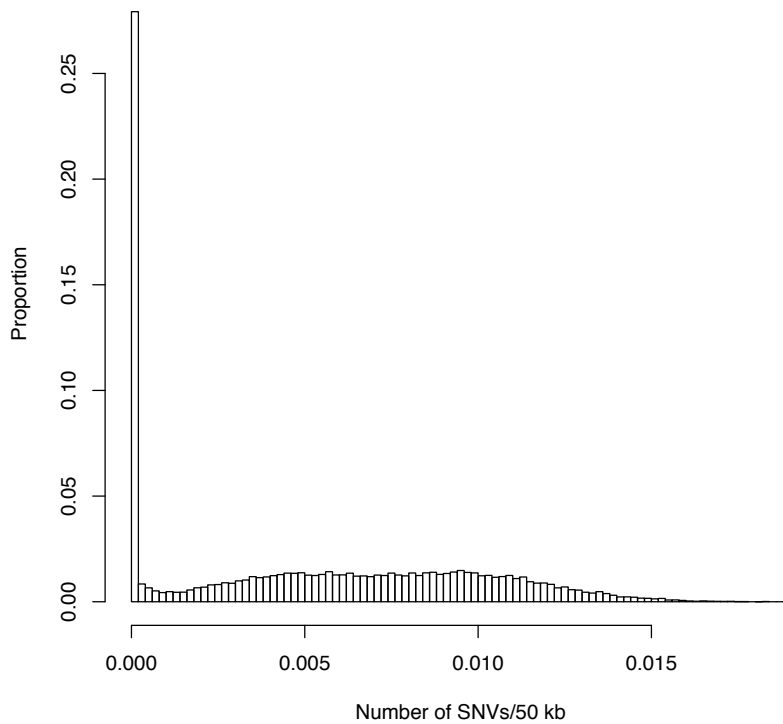

**Figure S14. SNV density distribution**

A histogram shows the number of SNVs in non-overlapped 50-kb windows across the *P. picta* genome. The distribution indicates that wild individuals of this species have a relatively high heterozygosity (~0.8 % on average), though the heterozygosity is being rapidly lost owing to inbreeding.
