# Supplementary material for: Madagascar ground gecko genome analysis characterizes asymmetric fates of duplicated genes
Source: PubMed Central journal article supplement (PMC5901865; doi:10.1186/s12915-018-0509-4), 2018-04-16
Supplement: 12915_2018_509_MOESM20_ESM.pdf [file 12915_2018_509_MOESM20_ESM.pdf]

## Additional file 20

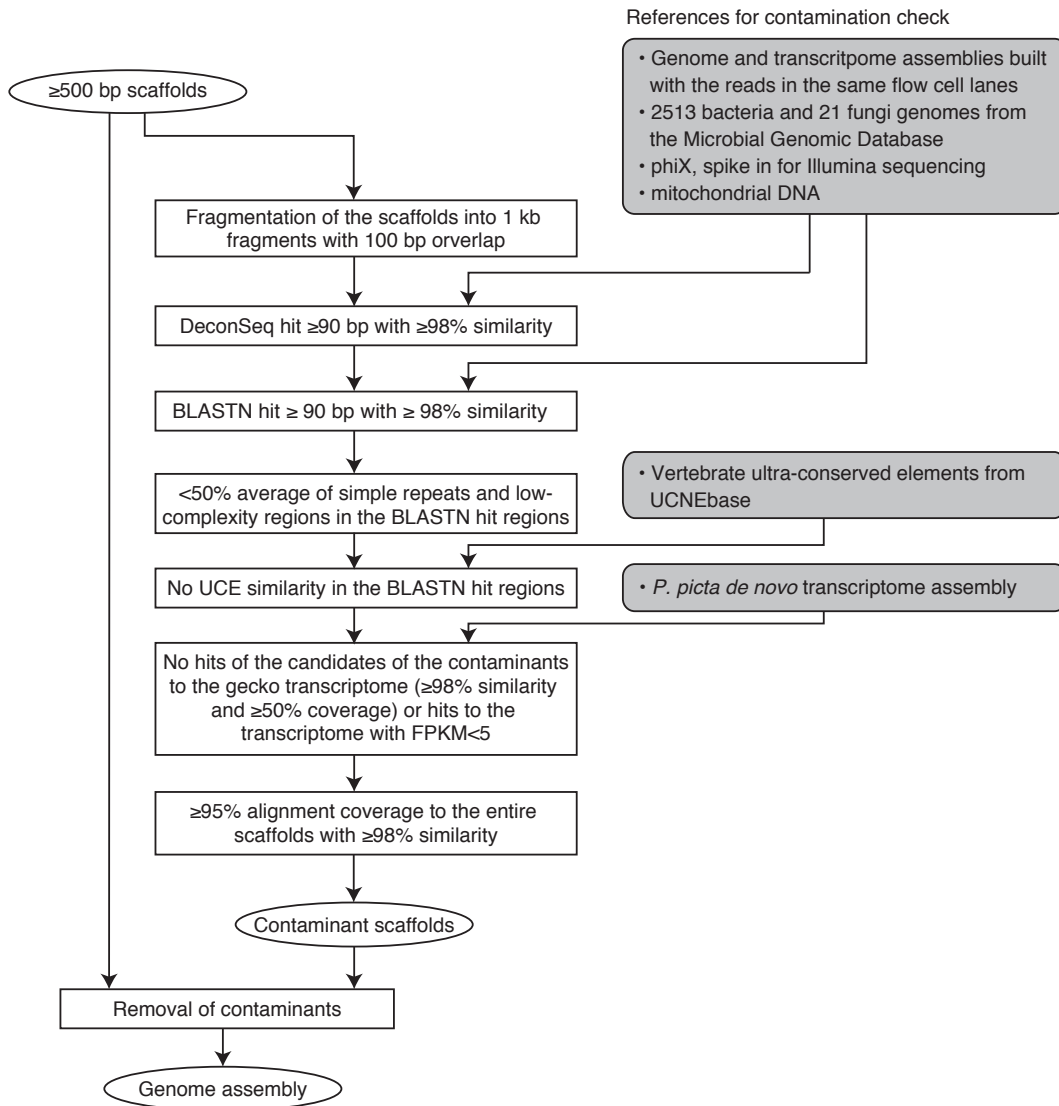

**Figure S17. Summary of contamination check for genome assembly**

A flowchart producing the final assembly, from which contaminant sequences are removed, is shown.
